# Supplementary material
Source: PubMed Central journal article supplement (PMC5095315)
Supplement: ajtr0008-4224-f7.pdf [file ajtr0008-4224-f7.pdf]

## Mutation near the binding interfaces at AHSP is pathogenic

**Supplementary Table 1.** Interface energy and predicted hot spots interface residues of the template-target protein complex

| Template | Target       | Interface Energy | Interface Residues Contacts at Template <--> Target                                                                                                                                                                                                                                                                                                                                                                                                                                                                                                                                                                                                                                                                                                                                                                                                                                                                                                                                                                                                                                                                                                                                                                                                                                                                                                                                                                                                                                                                                                                                                                                                                                                                                                                                                                                                                                                                                                                                                                                                                                                                                                                                                                                                                                 |
|----------|--------------|------------------|-------------------------------------------------------------------------------------------------------------------------------------------------------------------------------------------------------------------------------------------------------------------------------------------------------------------------------------------------------------------------------------------------------------------------------------------------------------------------------------------------------------------------------------------------------------------------------------------------------------------------------------------------------------------------------------------------------------------------------------------------------------------------------------------------------------------------------------------------------------------------------------------------------------------------------------------------------------------------------------------------------------------------------------------------------------------------------------------------------------------------------------------------------------------------------------------------------------------------------------------------------------------------------------------------------------------------------------------------------------------------------------------------------------------------------------------------------------------------------------------------------------------------------------------------------------------------------------------------------------------------------------------------------------------------------------------------------------------------------------------------------------------------------------------------------------------------------------------------------------------------------------------------------------------------------------------------------------------------------------------------------------------------------------------------------------------------------------------------------------------------------------------------------------------------------------------------------------------------------------------------------------------------------------|
| AHSP     | HBA1         | -14.34           | <p>                     pdb2_A_ASP_43 &lt;--&gt; pdb1_A_ASP_29<br/>                     pdb2_A_VAL_26 &lt;--&gt; pdb1_A_TYR_51<br/>                     pdb2_A_VAL_26 &lt;--&gt; pdb1_A_ASN_50<br/>                     pdb2_A_GLN_24 &lt;--&gt; pdb1_A_TYR_51<br/>                     pdb2_A_GLN_24 &lt;--&gt; pdb1_A_TYR_52<br/>                     pdb2_A_ASP_29 &lt;--&gt; pdb1_A_PHE_47<br/>                     pdb2_A_ASP_29 &lt;--&gt; pdb1_A_ASN_46<br/>                     pdb2_A_ASP_29 &lt;--&gt; pdb1_A_ASP_43<br/>                     pdb2_A_GLN_25 &lt;--&gt; pdb1_A_PHE_47<br/>                     pdb2_A_GLN_25 &lt;--&gt; pdb1_A_TRP_44<br/>                     pdb2_A_PHE_47 &lt;--&gt; pdb1_A_GLN_25<br/>                     pdb2_A_PHE_47 &lt;--&gt; pdb1_A_GLN_24<br/>                     pdb2_A_TYR_48 &lt;--&gt; pdb1_A_GLN_24<br/>                     pdb2_A_PHE_47 &lt;--&gt; pdb1_A_VAL_26<br/>                     pdb2_A_TYR_48 &lt;--&gt; pdb1_A_LEU_21<br/>                     pdb2_A_VAL_20 &lt;--&gt; pdb1_A_GLU_17<br/>                     pdb2_A_ASN_50 &lt;--&gt; pdb1_A_ASP_29<br/>                     pdb2_A_GLN_24 &lt;--&gt; pdb1_A_PHE_47<br/>                     pdb2_A_GLN_24 &lt;--&gt; pdb1_A_TYR_48<br/>                     pdb2_A_VAL_26 &lt;--&gt; pdb1_A_PHE_47<br/>                     pdb2_A_PHE_47 &lt;--&gt; pdb1_A_ASP_29<br/>                     pdb2_A_TRP_44 &lt;--&gt; pdb1_A_TRP_44<br/>                     pdb2_A_TYR_51 &lt;--&gt; pdb1_A_GLN_24<br/>                     pdb2_A_ASN_46 &lt;--&gt; pdb1_A_ASP_29<br/>                     pdb2_A_TYR_51 &lt;--&gt; pdb1_A_VAL_26<br/>                     pdb2_A_ASN_50 &lt;--&gt; pdb1_A_VAL_26<br/>                     pdb2_A_ASP_29 &lt;--&gt; pdb1_A_ASN_50<br/>                     pdb2_A_LEU_21 &lt;--&gt; pdb1_A_LEU_21<br/>                     pdb2_A_PHE_47 &lt;--&gt; pdb1_A_PRO_30<br/>                     pdb2_A_GLU_17 &lt;--&gt; pdb1_A_GLN_24<br/>                     pdb2_A_GLU_17 &lt;--&gt; pdb1_A_VAL_20<br/>                     pdb2_A_TYR_52 &lt;--&gt; pdb1_A_GLN_24<br/>                     pdb2_A_LEU_21 &lt;--&gt; pdb1_A_TRP_44<br/>                     pdb2_A_GLN_24 &lt;--&gt; pdb1_A_GLU_17                 </p> |
| AHSP     | G60V of HBA1 | -68.52           | <p>                     pdb2_A_LEU_31 &lt;--&gt; pdb1_A_PHE_118<br/>                     pdb2_A_LEU_31 &lt;--&gt; pdb1_A_ALA_111<br/>                     pdb2_A_LEU_31 &lt;--&gt; pdb1_A_LEU_110<br/>                     pdb2_A_GLN_24 &lt;--&gt; pdb1_A_SER_36<br/>                     pdb2_A_GLN_24 &lt;--&gt; pdb1_A_LEU_35<br/>                     pdb2_A_VAL_26 &lt;--&gt; pdb1_A_ARG_32<br/>                     pdb2_A_PHE_47 &lt;--&gt; pdb1_A_THR_39<br/>                     pdb2_A_SER_91 &lt;--&gt; pdb1_A_PRO_120<br/>                     pdb2_A_ASP_43 &lt;--&gt; pdb1_A_VAL_97<br/>                     pdb2_A_LEU_21 &lt;--&gt; pdb1_A_SER_36<br/>                     pdb2_A_LEU_21 &lt;--&gt; pdb1_A_PHE_37                 </p>                                                                                                                                                                                                                                                                                                                                                                                                                                                                                                                                                                                                                                                                                                                                                                                                                                                                                                                                                                                                                                                                                                                                                                                                                                                                                                                                                                                                                                                                                                                             |

## Mutation near the binding interfaces at AHSP is pathogenic

pdb2\_A\_LYS\_90 <--> pdb1\_A\_PRO\_120  
pdb2\_A\_PHE\_88 <--> pdb1\_A\_HIS\_123  
pdb2\_A\_LEU\_21 <--> pdb1\_A\_PRO\_38  
pdb2\_A\_LEU\_31 <--> pdb1\_A\_LEU\_107  
pdb2\_A\_ASP\_29 <--> pdb1\_A\_ALA\_112  
pdb2\_A\_PRO\_30 <--> pdb1\_A\_ALA\_111  
pdb2\_A\_ASP\_29 <--> pdb1\_A\_ALA\_111  
pdb2\_A\_LEU\_31 <--> pdb1\_A\_ASP\_127  
pdb2\_A\_LEU\_31 <--> pdb1\_A\_HIS\_123  
pdb2\_A\_VAL\_32 <--> pdb1\_A\_HIS\_123  
pdb2\_A\_VAL\_32 <--> pdb1\_A\_HIS\_104  
pdb2\_A\_VAL\_32 <--> pdb1\_A\_LEU\_107  
pdb2\_A\_VAL\_32 <--> pdb1\_A\_ASP\_127  
pdb2\_A\_GLN\_25 <--> pdb1\_A\_VAL\_108  
pdb2\_A\_GLN\_25 <--> pdb1\_A\_HIS\_104  
pdb2\_A\_PHE\_47 <--> pdb1\_A\_PHE\_37  
pdb2\_A\_LEU\_89 <--> pdb1\_A\_PRO\_120  
pdb2\_A\_SER\_33 <--> pdb1\_A\_HIS\_123  
pdb2\_A\_SER\_33 <--> pdb1\_A\_ALA\_124  
pdb2\_A\_SER\_33 <--> pdb1\_A\_ASP\_127  
pdb2\_A\_ASP\_29 <--> pdb1\_A\_VAL\_108  
pdb2\_A\_PRO\_30 <--> pdb1\_A\_HIS\_123  
pdb2\_A\_TYR\_85 <--> pdb1\_A\_HIS\_123  
pdb2\_A\_PRO\_30 <--> pdb1\_A\_VAL\_108  
pdb2\_A\_PRO\_30 <--> pdb1\_A\_LEU\_107  
pdb2\_A\_PRO\_30 <--> pdb1\_A\_HIS\_104  
pdb2\_A\_GLN\_25 <--> pdb1\_A\_SER\_36  
AHSP      L92F of HBA1    -53.37    pdb2\_A\_VAL\_97 <--> pdb1\_A\_LEU\_31  
pdb2\_A\_VAL\_97 <--> pdb1\_A\_VAL\_32  
pdb2\_A\_LYS\_128 <--> pdb1\_A\_GLN\_24  
pdb2\_A\_SER\_36 <--> pdb1\_A\_THR\_39  
pdb2\_A\_PRO\_120 <--> pdb1\_A\_TYR\_51  
pdb2\_A\_ALA\_124 <--> pdb1\_A\_LEU\_21  
pdb2\_A\_PRO\_120 <--> pdb1\_A\_TYR\_52  
pdb2\_A\_ALA\_124 <--> pdb1\_A\_GLN\_24  
pdb2\_A\_PHE\_37 <--> pdb1\_A\_THR\_39  
pdb2\_A\_PHE\_37 <--> pdb1\_A\_ASP\_36  
pdb2\_A\_PRO\_96 <--> pdb1\_A\_LEU\_31  
pdb2\_A\_THR\_135 <--> pdb1\_A\_ASP\_29  
pdb2\_A\_ASP\_127 <--> pdb1\_A\_GLN\_25  
pdb2\_A\_ALA\_121 <--> pdb1\_A\_GLU\_17  
pdb2\_A\_PRO\_120 <--> pdb1\_A\_GLU\_17  
pdb2\_A\_PHE\_118 <--> pdb1\_A\_TYR\_51  
pdb2\_A\_LEU\_107 <--> pdb1\_A\_TRP\_44  
pdb2\_A\_LEU\_101 <--> pdb1\_A\_ASP\_36  
pdb2\_A\_LEU\_101 <--> pdb1\_A\_VAL\_32  
pdb2\_A\_THR\_119 <--> pdb1\_A\_TYR\_51  
pdb2\_A\_PRO\_115 <--> pdb1\_A\_TYR\_51  
pdb2\_A\_HIS\_104 <--> pdb1\_A\_TRP\_44

## Mutation near the binding interfaces at AHSP is pathogenic

|      |              |        |                                   |
|------|--------------|--------|-----------------------------------|
|      |              |        | pdb2_A_PRO_120 <--> pdb1_A_TYR_48 |
|      |              |        | pdb2_A_HIS_104 <--> pdb1_A_VAL_40 |
|      |              |        | pdb2_A_LYS_100 <--> pdb1_A_PRO_30 |
|      |              |        | pdb2_A_ASP_127 <--> pdb1_A_LEU_21 |
|      |              |        | pdb2_A_HIS_104 <--> pdb1_A_ASP_43 |
|      |              |        | pdb2_A_ALA_111 <--> pdb1_A_PHE_47 |
|      |              |        | pdb2_A_VAL_108 <--> pdb1_A_ASP_43 |
|      |              |        | pdb2_A_ASP_127 <--> pdb1_A_TRP_44 |
|      |              |        | pdb2_A_HIS_123 <--> pdb1_A_TYR_48 |
|      |              |        | pdb2_A_HIS_123 <--> pdb1_A_LEU_21 |
|      |              |        | pdb2_A_PHE_118 <--> pdb1_A_PHE_47 |
|      |              |        | pdb2_A_HIS_123 <--> pdb1_A_TRP_44 |
| AHSP | K17M of HBA1 | -47.51 | pdb2_A_HIS_123 <--> pdb1_A_PHE_47 |
|      |              |        | pdb2_A_LEU_31 <--> pdb1_A_PHE_118 |
|      |              |        | pdb2_A_ASN_50 <--> pdb1_A_THR_39  |
|      |              |        | pdb2_A_LEU_31 <--> pdb1_A_ALA_111 |
|      |              |        | pdb2_A_PHE_27 <--> pdb1_A_LEU_3   |
|      |              |        | pdb2_A_ASN_46 <--> pdb1_A_THR_39  |
|      |              |        | pdb2_A_ASN_46 <--> pdb1_A_PRO_38  |
|      |              |        | pdb2_A_ASP_87 <--> pdb1_A_LEU_3   |
|      |              |        | pdb2_A_LEU_31 <--> pdb1_A_HIS_104 |
|      |              |        | pdb2_A_ASN_28 <--> pdb1_A_LYS_8   |
|      |              |        | pdb2_A_ASP_29 <--> pdb1_A_PHE_118 |
|      |              |        | pdb2_A_LEU_31 <--> pdb1_A_LEU_107 |
|      |              |        | pdb2_A_ASP_29 <--> pdb1_A_ALA_112 |
|      |              |        | pdb2_A_PRO_30 <--> pdb1_A_ALA_111 |
|      |              |        | pdb2_A_ASP_29 <--> pdb1_A_ALA_111 |
|      |              |        | pdb2_A_LEU_31 <--> pdb1_A_VAL_108 |
|      |              |        | pdb2_A_ASN_28 <--> pdb1_A_SER_4   |
|      |              |        | pdb2_A_ASN_28 <--> pdb1_A_ASP_7   |
|      |              |        | pdb2_A_ASP_29 <--> pdb1_A_PRO_115 |
|      |              |        | pdb2_A_ASP_29 <--> pdb1_A_VAL_11  |
|      |              |        | pdb2_A_ASN_28 <--> pdb1_A_VAL_11  |
|      |              |        | pdb2_A_ASP_43 <--> pdb1_A_PRO_38  |
|      |              |        | pdb2_A_ASP_43 <--> pdb1_A_SER_36  |
|      |              |        | pdb2_A_ASP_43 <--> pdb1_A_PHE_37  |
|      |              |        | pdb2_A_LEU_31 <--> pdb1_A_HIS_123 |
|      |              |        | pdb2_A_VAL_32 <--> pdb1_A_HIS_123 |
|      |              |        | pdb2_A_VAL_32 <--> pdb1_A_HIS_104 |
|      |              |        | pdb2_A_PHE_47 <--> pdb1_A_LEU_35  |
|      |              |        | pdb2_A_ASN_28 <--> pdb1_A_PRO_120 |
|      |              |        | pdb2_A_PHE_47 <--> pdb1_A_PRO_38  |
|      |              |        | pdb2_A_LEU_31 <--> pdb1_A_VAL_11  |
|      |              |        | pdb2_A_SER_33 <--> pdb1_A_ASP_127 |
|      |              |        | pdb2_A_PRO_30 <--> pdb1_A_VAL_108 |
|      |              |        | pdb2_A_ASP_43 <--> pdb1_A_LEU_101 |
|      |              |        | pdb2_A_PRO_30 <--> pdb1_A_HIS_104 |
| AHSP | W15R of HBA1 | -50.98 | pdb2_A_ASN_28 <--> pdb1_A_PHE_118 |
|      |              |        | pdb2_A_VAL_97 <--> pdb1_A_LEU_31  |

## Mutation near the binding interfaces at AHSP is pathogenic

pdb2\_A\_VAL\_97 <--> pdb1\_A\_VAL\_32  
pdb2\_A\_LYS\_128 <--> pdb1\_A\_GLN\_24  
pdb2\_A\_SER\_36 <--> pdb1\_A\_THR\_39  
pdb2\_A\_PRO\_120 <--> pdb1\_A\_TYR\_51  
pdb2\_A\_ALA\_124 <--> pdb1\_A\_LEU\_21  
pdb2\_A\_PRO\_120 <--> pdb1\_A\_TYR\_52  
pdb2\_A\_ALA\_124 <--> pdb1\_A\_GLN\_24  
pdb2\_A\_PHE\_37 <--> pdb1\_A\_THR\_39  
pdb2\_A\_LYS\_100 <--> pdb1\_A\_ASP\_29  
pdb2\_A\_PRO\_96 <--> pdb1\_A\_LEU\_31  
pdb2\_A\_ASP\_127 <--> pdb1\_A\_GLN\_25  
pdb2\_A\_ALA\_121 <--> pdb1\_A\_GLU\_17  
pdb2\_A\_PRO\_120 <--> pdb1\_A\_GLY\_14  
pdb2\_A\_PRO\_120 <--> pdb1\_A\_GLU\_17  
pdb2\_A\_PHE\_37 <--> pdb1\_A\_ASP\_36  
pdb2\_A\_LEU\_3 <--> pdb1\_A\_VAL\_20  
pdb2\_A\_PHE\_118 <--> pdb1\_A\_TYR\_51  
pdb2\_A\_LEU\_107 <--> pdb1\_A\_TRP\_44  
pdb2\_A\_LEU\_101 <--> pdb1\_A\_VAL\_32  
pdb2\_A\_THR\_119 <--> pdb1\_A\_TYR\_51  
pdb2\_A\_PHE\_37 <--> pdb1\_A\_VAL\_40  
pdb2\_A\_PRO\_115 <--> pdb1\_A\_TYR\_51  
pdb2\_A\_HIS\_104 <--> pdb1\_A\_TRP\_44  
pdb2\_A\_PRO\_120 <--> pdb1\_A\_TYR\_48  
pdb2\_A\_ASP\_127 <--> pdb1\_A\_GLN\_24  
pdb2\_A\_HIS\_104 <--> pdb1\_A\_VAL\_40  
pdb2\_A\_LYS\_100 <--> pdb1\_A\_PRO\_30  
pdb2\_A\_ASP\_127 <--> pdb1\_A\_LEU\_21  
pdb2\_A\_HIS\_104 <--> pdb1\_A\_ASP\_43  
pdb2\_A\_ALA\_111 <--> pdb1\_A\_PHE\_47  
pdb2\_A\_VAL\_108 <--> pdb1\_A\_ASP\_43  
pdb2\_A\_ASP\_127 <--> pdb1\_A\_TRP\_44  
pdb2\_A\_HIS\_123 <--> pdb1\_A\_TYR\_48  
pdb2\_A\_HIS\_123 <--> pdb1\_A\_LEU\_21  
pdb2\_A\_SER\_4 <--> pdb1\_A\_GLU\_17  
pdb2\_A\_PHE\_118 <--> pdb1\_A\_PHE\_47  
pdb2\_A\_ALA\_116 <--> pdb1\_A\_TYR\_51  
pdb2\_A\_HIS\_123 <--> pdb1\_A\_TRP\_44  
pdb2\_A\_HIS\_123 <--> pdb1\_A\_PHE\_47  
HBA1 Y85C of AHSP -62.56 pdb1\_A\_VAL\_97 <--> pdb2\_A\_LEU\_31  
pdb1\_A\_VAL\_97 <--> pdb2\_A\_VAL\_32  
pdb1\_A\_LYS\_128 <--> pdb2\_A\_GLN\_24  
pdb1\_A\_SER\_36 <--> pdb2\_A\_THR\_39  
pdb1\_A\_PRO\_120 <--> pdb2\_A\_TYR\_51  
pdb1\_A\_ALA\_124 <--> pdb2\_A\_LEU\_21  
pdb1\_A\_PRO\_120 <--> pdb2\_A\_TYR\_52  
pdb1\_A\_ALA\_124 <--> pdb2\_A\_GLN\_24  
pdb1\_A\_PHE\_37 <--> pdb2\_A\_THR\_39  
pdb1\_A\_LYS\_100 <--> pdb2\_A\_ASP\_29

## Mutation near the binding interfaces at AHSP is pathogenic

|      |              |       |                                   |
|------|--------------|-------|-----------------------------------|
|      |              |       | pdb1_A_PRO_96 <--> pdb2_A_LEU_31  |
|      |              |       | pdb1_A ASP_127 <--> pdb2_A_GLN_25 |
|      |              |       | pdb1_A_ALA_121 <--> pdb2_A_GLU_17 |
|      |              |       | pdb1_A_PRO_120 <--> pdb2_A_GLU_17 |
|      |              |       | pdb1_A_PHE_37 <--> pdb2_A ASP_36  |
|      |              |       | pdb1_A_PHE_118 <--> pdb2_A TYR_51 |
|      |              |       | pdb1_A_LEU_107 <--> pdb2_A TRP_44 |
|      |              |       | pdb1_A_LEU_101 <--> pdb2_A ASP_36 |
|      |              |       | pdb1_A_LEU_101 <--> pdb2_A_VAL_32 |
|      |              |       | pdb1_A_THR_119 <--> pdb2_A TYR_51 |
|      |              |       | pdb1_A_PHE_37 <--> pdb2_A_VAL_40  |
|      |              |       | pdb1_A_PRO_115 <--> pdb2_A TYR_51 |
|      |              |       | pdb1_A_HIS_104 <--> pdb2_A TRP_44 |
|      |              |       | pdb1_A_PRO_120 <--> pdb2_A TYR_48 |
|      |              |       | pdb1_A_HIS_104 <--> pdb2_A_VAL_40 |
|      |              |       | pdb1_A_LYS_100 <--> pdb2_A_PRO_30 |
|      |              |       | pdb1_A ASP_127 <--> pdb2_A_LEU_21 |
|      |              |       | pdb1_A_HIS_104 <--> pdb2_A ASP_43 |
|      |              |       | pdb1_A_ALA_111 <--> pdb2_A_PHE_47 |
|      |              |       | pdb1_A_VAL_108 <--> pdb2_A ASP_43 |
|      |              |       | pdb1_A ASP_127 <--> pdb2_A TRP_44 |
|      |              |       | pdb1_A_HIS_123 <--> pdb2_A TYR_48 |
|      |              |       | pdb1_A_HIS_123 <--> pdb2_A_LEU_21 |
|      |              |       | pdb1_A_PHE_118 <--> pdb2_A_PHE_47 |
|      |              |       | pdb1_A_HIS_123 <--> pdb2_A TRP_44 |
|      |              |       | pdb1_A_HIS_123 <--> pdb2_A_PHE_47 |
| HBA1 | L21P of AHSP | -60.0 | pdb2_A_LEU_31 <--> pdb1_A_PHE_118 |
|      |              |       | pdb2_A ASP_43 <--> pdb1_A_LEU_101 |
|      |              |       | pdb2_A_LEU_31 <--> pdb1_A_ALA_111 |
|      |              |       | pdb2_A_LEU_31 <--> pdb1_A_LEU_110 |
|      |              |       | pdb2_A_SER_91 <--> pdb1_A_PRO_120 |
|      |              |       | pdb2_A_TRP_44 <--> pdb1_A_SER_36  |
|      |              |       | pdb2_A_LYS_90 <--> pdb1_A_PRO_120 |
|      |              |       | pdb2_A_PRO_21 <--> pdb1_A_SER_36  |
|      |              |       | pdb2_A_PRO_21 <--> pdb1_A_LEU_35  |
|      |              |       | pdb2_A_PRO_21 <--> pdb1_A_PRO_38  |
|      |              |       | pdb2_A_LEU_31 <--> pdb1_A_LEU_107 |
|      |              |       | pdb2_A ASP_29 <--> pdb1_A_ALA_112 |
|      |              |       | pdb2_A_PRO_30 <--> pdb1_A_ALA_111 |
|      |              |       | pdb2_A ASP_29 <--> pdb1_A_ALA_111 |
|      |              |       | pdb2_A ASP_36 <--> pdb1_A ASP_127 |
|      |              |       | pdb2_A_LEU_31 <--> pdb1_A ASP_127 |
|      |              |       | pdb2_A_LEU_31 <--> pdb1_A_HIS_123 |
|      |              |       | pdb2_A_VAL_32 <--> pdb1_A_HIS_123 |
|      |              |       | pdb2_A_VAL_32 <--> pdb1_A_HIS_104 |
|      |              |       | pdb2_A_VAL_32 <--> pdb1_A_LEU_107 |
|      |              |       | pdb2_A_VAL_32 <--> pdb1_A ASP_127 |
|      |              |       | pdb2_A_GLN_25 <--> pdb1_A_VAL_108 |
|      |              |       | pdb2_A_GLN_25 <--> pdb1_A_HIS_104 |

## Mutation near the binding interfaces at AHSP is pathogenic

|      |              |        |                                   |
|------|--------------|--------|-----------------------------------|
|      |              |        | pdb2_A_PHE_47 <--> pdb1_A_THR_39  |
|      |              |        | pdb2_A_PHE_47 <--> pdb1_A_PRO_38  |
|      |              |        | pdb2_A_SER_33 <--> pdb1_A_HIS_123 |
|      |              |        | pdb2_A_SER_33 <--> pdb1_A_ALA_124 |
|      |              |        | pdb2_A_SER_33 <--> pdb1_A_ASP_127 |
|      |              |        | pdb2_A_ASP_29 <--> pdb1_A_VAL_108 |
|      |              |        | pdb2_A_PRO_30 <--> pdb1_A_HIS_123 |
|      |              |        | pdb2_A_TYR_85 <--> pdb1_A_HIS_123 |
|      |              |        | pdb2_A_PRO_30 <--> pdb1_A_VAL_108 |
|      |              |        | pdb2_A_PRO_30 <--> pdb1_A_LEU_107 |
|      |              |        | pdb2_A_GLN_25 <--> pdb1_A_SER_36  |
|      |              |        | pdb2_A_LEU_89 <--> pdb1_A_HIS_123 |
| HBA1 | V56G of AHSP | -58.47 | pdb1_A_VAL_97 <--> pdb2_A_LEU_31  |
|      |              |        | pdb1_A_VAL_97 <--> pdb2_A_VAL_32  |
|      |              |        | pdb1_A_LYS_128 <--> pdb2_A_GLN_24 |
|      |              |        | pdb1_A_SER_36 <--> pdb2_A_THR_39  |
|      |              |        | pdb1_A_PRO_120 <--> pdb2_A_TYR_51 |
|      |              |        | pdb1_A_ALA_124 <--> pdb2_A_LEU_21 |
|      |              |        | pdb1_A_PRO_120 <--> pdb2_A_TYR_52 |
|      |              |        | pdb1_A_ALA_124 <--> pdb2_A_GLN_24 |
|      |              |        | pdb1_A_PHE_37 <--> pdb2_A_THR_39  |
|      |              |        | pdb1_A_PHE_37 <--> pdb2_A_ASP_36  |
|      |              |        | pdb1_A_PRO_96 <--> pdb2_A_LEU_31  |
|      |              |        | pdb1_A_THR_135 <--> pdb2_A_ASP_29 |
|      |              |        | pdb1_A_ASP_127 <--> pdb2_A_GLN_25 |
|      |              |        | pdb1_A_ALA_121 <--> pdb2_A_GLU_17 |
|      |              |        | pdb1_A_PRO_120 <--> pdb2_A_GLU_17 |
|      |              |        | pdb1_A_PHE_118 <--> pdb2_A_TYR_51 |
|      |              |        | pdb1_A_LEU_107 <--> pdb2_A_TRP_44 |
|      |              |        | pdb1_A_LEU_101 <--> pdb2_A_ASP_36 |
|      |              |        | pdb1_A_LEU_101 <--> pdb2_A_VAL_32 |
|      |              |        | pdb1_A_THR_119 <--> pdb2_A_TYR_51 |
|      |              |        | pdb1_A_PRO_115 <--> pdb2_A_TYR_51 |
|      |              |        | pdb1_A_HIS_104 <--> pdb2_A_TRP_44 |
|      |              |        | pdb1_A_PRO_120 <--> pdb2_A_TYR_48 |
|      |              |        | pdb1_A_HIS_104 <--> pdb2_A_VAL_40 |
|      |              |        | pdb1_A_LYS_100 <--> pdb2_A_PRO_30 |
|      |              |        | pdb1_A_ASP_127 <--> pdb2_A_LEU_21 |
|      |              |        | pdb1_A_HIS_104 <--> pdb2_A_ASP_43 |
|      |              |        | pdb1_A_ALA_111 <--> pdb2_A_PHE_47 |
|      |              |        | pdb1_A_VAL_108 <--> pdb2_A_ASP_43 |
|      |              |        | pdb1_A_ASP_127 <--> pdb2_A_TRP_44 |
|      |              |        | pdb1_A_HIS_123 <--> pdb2_A_LEU_21 |
|      |              |        | pdb1_A_PHE_118 <--> pdb2_A_PHE_47 |
|      |              |        | pdb1_A_HIS_123 <--> pdb2_A_TRP_44 |
|      |              |        | pdb1_A_HIS_123 <--> pdb2_A_PHE_47 |
| AHSP | HBA2         | -7.05  | pdb1_A_HIS_112 <--> pdb2_B_THR_8  |
|      |              |        | pdb1_A_PRO_114 <--> pdb2_B_LYS_11 |
|      |              |        | pdb1_A_GLU_116 <--> pdb2_B_LYS_7  |

## Mutation near the binding interfaces at AHSP is pathogenic

|      |              |       |                                                                                                                                                                                                                                                                                                                                                                                                                                                                                                                                                                                                                                                                                                                                                                                                                                                                                                                                                                                                                                                                                                                                                                                                                                                                                                                                                                                                                                                                                                                                                                                                                                                                                                                                                                                                                                                                                                                                                                                                                                                                                                                                                                                                                                                                                                                                                                                                                                                                                                                                                                                                                                                                                                                                                                               |
|------|--------------|-------|-------------------------------------------------------------------------------------------------------------------------------------------------------------------------------------------------------------------------------------------------------------------------------------------------------------------------------------------------------------------------------------------------------------------------------------------------------------------------------------------------------------------------------------------------------------------------------------------------------------------------------------------------------------------------------------------------------------------------------------------------------------------------------------------------------------------------------------------------------------------------------------------------------------------------------------------------------------------------------------------------------------------------------------------------------------------------------------------------------------------------------------------------------------------------------------------------------------------------------------------------------------------------------------------------------------------------------------------------------------------------------------------------------------------------------------------------------------------------------------------------------------------------------------------------------------------------------------------------------------------------------------------------------------------------------------------------------------------------------------------------------------------------------------------------------------------------------------------------------------------------------------------------------------------------------------------------------------------------------------------------------------------------------------------------------------------------------------------------------------------------------------------------------------------------------------------------------------------------------------------------------------------------------------------------------------------------------------------------------------------------------------------------------------------------------------------------------------------------------------------------------------------------------------------------------------------------------------------------------------------------------------------------------------------------------------------------------------------------------------------------------------------------------|
|      |              |       | <p>           pdb1_B_LYS_120 &lt;--&gt; pdb2_B_THR_8<br/>           pdb1_A_HIS_20 &lt;--&gt; pdb2_B_PRO_4<br/>           pdb1_B_HIS_116 &lt;--&gt; pdb2_B_ALA_71<br/>           pdb1_B_GLU_121 &lt;--&gt; pdb2_B_GLY_15<br/>           pdb1_B_LYS_120 &lt;--&gt; pdb2_B_LYS_11<br/>           pdb1_A_HIS_112 &lt;--&gt; pdb2_B_LYS_7<br/>           pdb1_B_GLY_119 &lt;--&gt; pdb2_B_LYS_11<br/>           pdb1_A_TYR_24 &lt;--&gt; pdb2_B_PRO_4<br/>           pdb1_A_PRO_114 &lt;--&gt; pdb2_B_HIS_72<br/>           pdb1_A_PRO_114 &lt;--&gt; pdb2_B_VAL_73<br/>           pdb1_A_PRO_114 &lt;--&gt; pdb2_B_ALA_71<br/>           pdb1_B_HIS_117 &lt;--&gt; pdb2_B_ALA_71<br/>           pdb1_B_GLU_121 &lt;--&gt; pdb2_B_LYS_11<br/>           pdb1_A_ALA_115 &lt;--&gt; pdb2_B_ASP_75<br/>           pdb1_B_LYS_120 &lt;--&gt; pdb2_B_ALA_12<br/>           pdb1_A_ALA_115 &lt;--&gt; pdb2_B_VAL_73<br/>           pdb1_B_PHE_118 &lt;--&gt; pdb2_B_LYS_11<br/>           pdb1_A_PRO_5 &lt;--&gt; pdb2_A_GLN_68<br/>           pdb1_B_PRO_52 &lt;--&gt; pdb2_A_ASN_50<br/>           pdb1_A_ALA_121 &lt;--&gt; pdb2_A_ASN_50<br/>           pdb1_A_ASN_10 &lt;--&gt; pdb2_A_ASN_46<br/>           pdb1_A_THR_9 &lt;--&gt; pdb2_A_ARG_71<br/>           pdb1_B_THR_51 &lt;--&gt; pdb2_A_TYR_51<br/>           pdb1_A_LYS_17 &lt;--&gt; pdb2_A_GLU_35<br/>           pdb1_C_SER_344 &lt;--&gt; pdb2_A_PRO_60<br/>           pdb1_A_SER_4 &lt;--&gt; pdb2_A_ARG_53<br/>           pdb1_A_PRO_5 &lt;--&gt; pdb2_A_ASP_64<br/>           pdb1_A_THR_119 &lt;--&gt; pdb2_A_ASP_43<br/>           pdb1_A_ALA_121 &lt;--&gt; pdb2_A_ASN_46<br/>           pdb1_B_SER_50 &lt;--&gt; pdb2_A_GLN_54<br/>           pdb1_B_ASP_53 &lt;--&gt; pdb2_A_PHE_47<br/>           pdb1_A_ALA_6 &lt;--&gt; pdb2_A_ARG_53<br/>           pdb1_B_THR_51 &lt;--&gt; pdb2_A_ASN_50<br/>           pdb1_A_ALA_6 &lt;--&gt; pdb2_A_ILE_49<br/>           pdb1_A_GLU_117 &lt;--&gt; pdb2_A_THR_39<br/>           pdb1_A_ALA_116 &lt;--&gt; pdb2_A_THR_39<br/>           pdb1_B_THR_51 &lt;--&gt; pdb2_A_TYR_51<br/>           pdb1_B_THR_51 &lt;--&gt; pdb2_A_ASN_50<br/>           pdb1_A_ALA_13 &lt;--&gt; pdb2_A_GLU_42<br/>           pdb1_A_SER_4 &lt;--&gt; pdb2_A_ARG_53<br/>           pdb1_A_THR_119 &lt;--&gt; pdb2_A_ASP_43<br/>           pdb1_B_SER_50 &lt;--&gt; pdb2_A_GLN_54<br/>           pdb1_B_PRO_52 &lt;--&gt; pdb2_A_ASN_50<br/>           pdb1_A_THR_9 &lt;--&gt; pdb2_A_ARG_71<br/>           pdb1_A_LYS_17 &lt;--&gt; pdb2_A_GLU_35<br/>           pdb1_A_ALA_6 &lt;--&gt; pdb2_A_ARG_53<br/>           pdb1_C_SER_344 &lt;--&gt; pdb2_A_PRO_60<br/>           pdb1_A_ALA_116 &lt;--&gt; pdb2_A_ASP_43<br/>           pdb1_A_ALA_121 &lt;--&gt; pdb2_A_ASN_50         </p> |
| HBA2 | Y85C of AHSP | -1.77 |                                                                                                                                                                                                                                                                                                                                                                                                                                                                                                                                                                                                                                                                                                                                                                                                                                                                                                                                                                                                                                                                                                                                                                                                                                                                                                                                                                                                                                                                                                                                                                                                                                                                                                                                                                                                                                                                                                                                                                                                                                                                                                                                                                                                                                                                                                                                                                                                                                                                                                                                                                                                                                                                                                                                                                               |
| HBA2 | L21P of AHSP | -3.74 |                                                                                                                                                                                                                                                                                                                                                                                                                                                                                                                                                                                                                                                                                                                                                                                                                                                                                                                                                                                                                                                                                                                                                                                                                                                                                                                                                                                                                                                                                                                                                                                                                                                                                                                                                                                                                                                                                                                                                                                                                                                                                                                                                                                                                                                                                                                                                                                                                                                                                                                                                                                                                                                                                                                                                                               |

## Mutation near the binding interfaces at AHSP is pathogenic

|      |              |        |  |                                                                                                                                                                                                                                                                                                                                                                                                                                                                                                                                                                                                                                                                                                                                                                                                                                                                                                                                                                                                                                                                                                                                                                                                                                                                                                                                                                                                                                                                                                                                                                                                                                                                                                                                                                                                                                                                                                                                                                                                                                                                                                        |
|------|--------------|--------|--|--------------------------------------------------------------------------------------------------------------------------------------------------------------------------------------------------------------------------------------------------------------------------------------------------------------------------------------------------------------------------------------------------------------------------------------------------------------------------------------------------------------------------------------------------------------------------------------------------------------------------------------------------------------------------------------------------------------------------------------------------------------------------------------------------------------------------------------------------------------------------------------------------------------------------------------------------------------------------------------------------------------------------------------------------------------------------------------------------------------------------------------------------------------------------------------------------------------------------------------------------------------------------------------------------------------------------------------------------------------------------------------------------------------------------------------------------------------------------------------------------------------------------------------------------------------------------------------------------------------------------------------------------------------------------------------------------------------------------------------------------------------------------------------------------------------------------------------------------------------------------------------------------------------------------------------------------------------------------------------------------------------------------------------------------------------------------------------------------------|
|      |              |        |  | <p>           pdb1_A_ALA_116 &lt;--&gt; pdb2_A_THR_39<br/>           pdb1_A_PRO_5 &lt;--&gt; pdb2_A_GLN_68<br/>           pdb1_A_PRO_5 &lt;--&gt; pdb2_A_ASP_64<br/>           pdb1_B_ASP_53 &lt;--&gt; pdb2_A_PHE_47<br/>           pdb1_A_ASN_10 &lt;--&gt; pdb2_A_ASN_46<br/>           pdb1_A_VAL_122 &lt;--&gt; pdb2_A_ASN_46<br/>           pdb1_A_ALA_121 &lt;--&gt; pdb2_A_ASN_46<br/>           pdb1_A_ALA_6 &lt;--&gt; pdb2_A_ILE_49<br/>           pdb1_A_GLU_117 &lt;--&gt; pdb2_A_THR_39         </p>                                                                                                                                                                                                                                                                                                                                                                                                                                                                                                                                                                                                                                                                                                                                                                                                                                                                                                                                                                                                                                                                                                                                                                                                                                                                                                                                                                                                                                                                                                                                                                                     |
| HBA2 | V56G of AHSP | ‡      |  |                                                                                                                                                                                                                                                                                                                                                                                                                                                                                                                                                                                                                                                                                                                                                                                                                                                                                                                                                                                                                                                                                                                                                                                                                                                                                                                                                                                                                                                                                                                                                                                                                                                                                                                                                                                                                                                                                                                                                                                                                                                                                                        |
| AHSP | HBD          | -13.21 |  | <p>           pdb2_B_VAL_60 &lt;--&gt; pdb1_A_ASN_46<br/>           pdb2_B_VAL_57 &lt;--&gt; pdb1_A_ASP_43<br/>           pdb2_A_GLN_76 &lt;--&gt; pdb1_A_GLN_54<br/>           pdb2_B_GLY_56 &lt;--&gt; pdb1_A_ASP_43<br/>           pdb2_B_GLU_53 &lt;--&gt; pdb1_A_TRP_44<br/>           pdb2_A_ILE_74 &lt;--&gt; pdb1_A_GLN_54<br/>           pdb2_B_SER_47 &lt;--&gt; pdb1_A_ASP_29<br/>           pdb2_B_LEU_49 &lt;--&gt; pdb1_A_GLN_25<br/>           pdb2_B_GLY_48 &lt;--&gt; pdb1_A_ASP_29<br/>           pdb2_A_MET_120 &lt;--&gt; pdb1_A_LEU_31<br/>           pdb2_A_MET_120 &lt;--&gt; pdb1_A_PRO_30<br/>           pdb2_B_LEU_49 &lt;--&gt; pdb1_A_ASP_29<br/>           pdb2_B_VAL_60 &lt;--&gt; pdb1_A_ASP_43<br/>           pdb2_A_LYS_122 &lt;--&gt; pdb1_A_ASP_36<br/>           pdb2_A_LYS_122 &lt;--&gt; pdb1_A_LEU_31<br/>           pdb2_A_LYS_122 &lt;--&gt; pdb1_A_SER_33<br/>           pdb2_A_LYS_122 &lt;--&gt; pdb1_A_VAL_32<br/>           pdb2_A_PRO_121 &lt;--&gt; pdb1_A_VAL_32<br/>           pdb2_A_ASP_77 &lt;--&gt; pdb1_A_GLN_54<br/>           pdb2_A_PRO_121 &lt;--&gt; pdb1_A_PRO_30<br/>           pdb2_A_ASP_77 &lt;--&gt; pdb1_A_ASN_50<br/>           pdb2_A_ASP_77 &lt;--&gt; pdb1_A_ARG_53<br/>           pdb2_B_LEU_49 &lt;--&gt; pdb1_A_PRO_30<br/>           pdb2_B_LYS_59 &lt;--&gt; pdb1_A_PHE_47<br/>           pdb2_C_ASP_68 &lt;--&gt; pdb1_A_ASP_29<br/>           pdb2_A_GLU_73 &lt;--&gt; pdb1_A_TYR_51<br/>           pdb2_A_GLU_73 &lt;--&gt; pdb1_A_GLN_54<br/>           pdb2_A_MET_120 &lt;--&gt; pdb1_A_ASP_29<br/>           pdb2_A_GLN_125 &lt;--&gt; pdb1_A_ASP_36<br/>           pdb2_B_GLU_63 &lt;--&gt; pdb1_A_ASN_50<br/>           pdb2_B_GLU_52 &lt;--&gt; pdb1_A_TRP_44<br/>           pdb2_B_GLU_52 &lt;--&gt; pdb1_A_LEU_21<br/>           pdb2_B_GLU_52 &lt;--&gt; pdb1_A_GLN_25<br/>           pdb2_A_GLN_125 &lt;--&gt; pdb1_A_THR_39<br/>           pdb2_A_PRO_121 &lt;--&gt; pdb1_A_VAL_40<br/>           pdb2_A_ASP_77 &lt;--&gt; pdb1_A_ARG_63<br/>           pdb2_A_ARG_116 &lt;--&gt; pdb1_A_LEU_31         </p> |
| HBD  | Y85C of AHSP | -8.09  |  | <p>           pdb1_B_VAL_60 &lt;--&gt; pdb2_A_ASN_46<br/>           pdb1_A_GLN_125 &lt;--&gt; pdb2_A_VAL_40         </p>                                                                                                                                                                                                                                                                                                                                                                                                                                                                                                                                                                                                                                                                                                                                                                                                                                                                                                                                                                                                                                                                                                                                                                                                                                                                                                                                                                                                                                                                                                                                                                                                                                                                                                                                                                                                                                                                                                                                                                               |



## Mutation near the binding interfaces at AHSP is pathogenic

|     |              |        |                                                                                                                                                                                                                                                                                                                                                                                                                                                                                                                                                                                                                                                                                                                                                                                                                                                                                                                                                                                                                                                                                                                                                                                                                                                                                                                                                                                                                                                                                                                                                                                                                                                                                                                                                                                                                                                                                                                                                                                                                                                                                                                                                                                                                                                                                                                                                                                                                                                                                                                                                                                                                                                                                                                                                                                       |
|-----|--------------|--------|---------------------------------------------------------------------------------------------------------------------------------------------------------------------------------------------------------------------------------------------------------------------------------------------------------------------------------------------------------------------------------------------------------------------------------------------------------------------------------------------------------------------------------------------------------------------------------------------------------------------------------------------------------------------------------------------------------------------------------------------------------------------------------------------------------------------------------------------------------------------------------------------------------------------------------------------------------------------------------------------------------------------------------------------------------------------------------------------------------------------------------------------------------------------------------------------------------------------------------------------------------------------------------------------------------------------------------------------------------------------------------------------------------------------------------------------------------------------------------------------------------------------------------------------------------------------------------------------------------------------------------------------------------------------------------------------------------------------------------------------------------------------------------------------------------------------------------------------------------------------------------------------------------------------------------------------------------------------------------------------------------------------------------------------------------------------------------------------------------------------------------------------------------------------------------------------------------------------------------------------------------------------------------------------------------------------------------------------------------------------------------------------------------------------------------------------------------------------------------------------------------------------------------------------------------------------------------------------------------------------------------------------------------------------------------------------------------------------------------------------------------------------------------------|
|     |              |        | <p>           pdb1_A_GLN_125 &lt;--&gt; pdb2_A_THR_39<br/>           pdb1_B_LYS_59 &lt;--&gt; pdb2_A_PHE_47<br/>           pdb1_B_LEU_49 &lt;--&gt; pdb2_A_VAL_26<br/>           pdb1_B_LEU_49 &lt;--&gt; pdb2_A ASP_29<br/>           pdb1_A_ARG_134 &lt;--&gt; pdb2_A ASP_43<br/>           pdb1_B_VAL_60 &lt;--&gt; pdb2_A ASP_43<br/>           pdb1_A_LYS_122 &lt;--&gt; pdb2_A ASP_36<br/>           pdb1_A_LYS_122 &lt;--&gt; pdb2_A LEU_31<br/>           pdb1_A_LYS_122 &lt;--&gt; pdb2_A PRO_30<br/>           pdb1_A_LYS_122 &lt;--&gt; pdb2_A SER_33<br/>           pdb1_A_LYS_122 &lt;--&gt; pdb2_A VAL_32<br/>           pdb1_A ASP_77 &lt;--&gt; pdb2_A_GLN_54<br/>           pdb1_A ASP_77 &lt;--&gt; pdb2_A ASN_50<br/>           pdb1_A ASP_77 &lt;--&gt; pdb2_A ARG_53<br/>           pdb1_A_ARG_129 &lt;--&gt; pdb2_A ASP_36<br/>           pdb1_A_ARG_129 &lt;--&gt; pdb2_A_GLU_35<br/>           pdb1_A_GLU_73 &lt;--&gt; pdb2_A_GLN_54<br/>           pdb1_A_ARG_128 &lt;--&gt; pdb2_A ASP_43<br/>           pdb1_A_MET_120 &lt;--&gt; pdb2_A ASP_29<br/>           pdb1_A_GLN_125 &lt;--&gt; pdb2_A ASP_36<br/>           pdb1_B_GLU_63 &lt;--&gt; pdb2_A ASN_50<br/>           pdb1_B_GLU_52 &lt;--&gt; pdb2_A LEU_21<br/>           pdb1_B_GLU_52 &lt;--&gt; pdb2_A_GLN_24<br/>           pdb1_A_ARG_116 &lt;--&gt; pdb2_A LEU_31<br/>           pdb1_A_GLN_125 &lt;--&gt; pdb2_A ASP_36<br/>           pdb1_B_LYS_59 &lt;--&gt; pdb2_A ASN_50<br/>           pdb1_A_ARG_129 &lt;--&gt; pdb2_A ASP_36<br/>           pdb1_B_GLU_63 &lt;--&gt; pdb2_A ARG_53<br/>           pdb1_B_LEU_49 &lt;--&gt; pdb2_A_GLN_25<br/>           pdb1_A_ARG_129 &lt;--&gt; pdb2_A_GLU_35<br/>           pdb1_B_GLU_52 &lt;--&gt; pdb2_A_PHE_47<br/>           pdb1_B_LEU_49 &lt;--&gt; pdb2_A_GLN_24<br/>           pdb1_B_GLN_27 &lt;--&gt; pdb2_A_GLN_54<br/>           pdb1_A_GLN_125 &lt;--&gt; pdb2_A_THR_39<br/>           pdb1_A_GLU_73 &lt;--&gt; pdb2_A ARG_53<br/>           pdb1_A_LYS_122 &lt;--&gt; pdb2_A ASP_36<br/>           pdb1_B_VAL_60 &lt;--&gt; pdb2_A ASN_46<br/>           pdb1_A_GLU_73 &lt;--&gt; pdb2_A_GLN_54<br/>           pdb1_A_GLN_125 &lt;--&gt; pdb2_A_VAL_40<br/>           pdb1_A_GLN_76 &lt;--&gt; pdb2_A ARG_63<br/>           pdb1_B_GLU_53 &lt;--&gt; pdb2_A ASP_43<br/>           pdb1_D_LYS_115 &lt;--&gt; pdb2_A LEU_31<br/>           pdb1_B_GLY_56 &lt;--&gt; pdb2_A ASP_43<br/>           pdb1_A ASP_77 &lt;--&gt; pdb2_A ARG_53<br/>           pdb2_A LEU_67 &lt;--&gt; pdb1_D ASP_77<br/>           pdb2_A ASP_43 &lt;--&gt; pdb1_D ARG_69<br/>           pdb2_A_GLN_54 &lt;--&gt; pdb1_D_GLN_76<br/>           pdb2_A_GLN_54 &lt;--&gt; pdb1_D ASP_77<br/>           pdb2_A_GLU_42 &lt;--&gt; pdb1_E_GLY_28         </p> |
| HBD | L21P of AHSP | -12.05 |                                                                                                                                                                                                                                                                                                                                                                                                                                                                                                                                                                                                                                                                                                                                                                                                                                                                                                                                                                                                                                                                                                                                                                                                                                                                                                                                                                                                                                                                                                                                                                                                                                                                                                                                                                                                                                                                                                                                                                                                                                                                                                                                                                                                                                                                                                                                                                                                                                                                                                                                                                                                                                                                                                                                                                                       |
| HBD | V56G of AHSP | -4.66  |                                                                                                                                                                                                                                                                                                                                                                                                                                                                                                                                                                                                                                                                                                                                                                                                                                                                                                                                                                                                                                                                                                                                                                                                                                                                                                                                                                                                                                                                                                                                                                                                                                                                                                                                                                                                                                                                                                                                                                                                                                                                                                                                                                                                                                                                                                                                                                                                                                                                                                                                                                                                                                                                                                                                                                                       |

## Mutation near the binding interfaces at AHSP is pathogenic

|      |      |       |                                  |
|------|------|-------|----------------------------------|
|      |      |       | pdb2_A_ARG_71 <--> pdb1_D_LEU_70 |
|      |      |       | pdb2_A_GLN_72 <--> pdb1_E_GLN_27 |
|      |      |       | pdb2_A_ASN_50 <--> pdb1_D_GLU_73 |
|      |      |       | pdb2_A_GLU_42 <--> pdb1_E_GLN_27 |
|      |      |       | pdb2_A_ASN_50 <--> pdb1_D_GLN_76 |
|      |      |       | pdb2_A_ARG_53 <--> pdb1_D_ASP_77 |
|      |      |       | pdb2_A_ARG_53 <--> pdb1_D_GLN_76 |
|      |      |       | pdb2_A_ASN_46 <--> pdb1_D_GLU_73 |
|      |      |       | pdb2_A_ARG_53 <--> pdb1_D_GLU_73 |
|      |      |       | pdb2_A_PRO_60 <--> pdb1_E_ARG_67 |
|      |      |       | pdb2_A_ASN_46 <--> pdb1_E_ILE_26 |
|      |      |       | pdb2_A_ARG_71 <--> pdb1_E_ILE_26 |
|      |      |       | pdb2_A_ARG_71 <--> pdb1_E_GLN_27 |
|      |      |       | pdb2_A_GLN_54 <--> pdb1_D_THR_80 |
|      |      |       | pdb2_A_ASP_64 <--> pdb1_E_GLU_63 |
|      |      |       | pdb2_A_ASP_64 <--> pdb1_E_ARG_67 |
|      |      |       | pdb2_A_ARG_63 <--> pdb1_D_PHE_78 |
|      |      |       | pdb2_A_ASN_75 <--> pdb1_E_GLN_27 |
|      |      |       | pdb2_A_THR_39 <--> pdb1_F_LEU_87 |
| AHSP | KLF1 | -6.79 | pdb2_A_ARG_63 <--> pdb1_D_ASP_77 |
|      |      |       | pdb2_A_GLN_61 <--> pdb1_A_SER_23 |
|      |      |       | pdb2_A_ARG_71 <--> pdb1_A_HIS_38 |
|      |      |       | pdb2_A_ASN_46 <--> pdb1_A_VAL_37 |
|      |      |       | pdb2_A_GLU_34 <--> pdb1_A_GLU_10 |
|      |      |       | pdb2_A_GLN_68 <--> pdb1_A_SER_43 |
|      |      |       | pdb2_A_ASN_46 <--> pdb1_A_THR_39 |
|      |      |       | pdb2_A_GLN_72 <--> pdb1_A_THR_44 |
|      |      |       | pdb2_A_GLN_72 <--> pdb1_A_LYS_65 |
|      |      |       | pdb2_A_GLU_35 <--> pdb1_A_LYS_11 |
|      |      |       | pdb2_A_GLU_35 <--> pdb1_A_GLU_10 |
|      |      |       | pdb2_A_GLU_42 <--> pdb1_A_PHE_9  |
|      |      |       | pdb2_A_ASN_79 <--> pdb1_A_PRO_84 |
|      |      |       | pdb2_A_ASN_79 <--> pdb1_A_GLN_85 |
|      |      |       | pdb2_A_ASN_79 <--> pdb1_A_ARG_86 |
|      |      |       | pdb2_A_VAL_38 <--> pdb1_A_GLU_10 |
|      |      |       | pdb2_A_GLN_68 <--> pdb1_A_PRO_24 |
|      |      |       | pdb2_A_THR_39 <--> pdb1_A_VAL_12 |
|      |      |       | pdb2_A_THR_39 <--> pdb1_A_GLU_10 |
|      |      |       | pdb2_A_ASP_43 <--> pdb1_A_LYS_36 |
|      |      |       | pdb2_A_THR_39 <--> pdb1_A_LYS_36 |
|      |      |       | pdb2_A_GLU_42 <--> pdb1_A_HIS_38 |
|      |      |       | pdb2_A_VAL_38 <--> pdb1_A_PHE_9  |
|      |      |       | pdb2_A_GLN_68 <--> pdb1_A_VAL_41 |
|      |      |       | pdb2_A_GLN_68 <--> pdb1_A_THR_44 |
|      |      |       | pdb2_A_ASP_64 <--> pdb1_A_PRO_24 |
|      |      |       | pdb2_A_ASP_64 <--> pdb1_A_SER_23 |
|      |      |       | pdb2_A_ASN_75 <--> pdb1_A_GLN_85 |
|      |      |       | pdb2_A_ASN_75 <--> pdb1_A_HIS_87 |
|      |      |       | pdb2_A_THR_76 <--> pdb1_A_GLN_85 |

## Mutation near the binding interfaces at AHSP is pathogenic

|                                  |              |        |                                   |
|----------------------------------|--------------|--------|-----------------------------------|
| KLF1                             | Y85C of AHSP | -13.77 | pdb2_A_ARG_71 <--> pdb1_A_HIS_87  |
|                                  |              |        | pdb1_A_PRO_24 <--> pdb2_A_LEU_77  |
|                                  |              |        | pdb1_A_THR_39 <--> pdb2_A_ASN_23  |
|                                  |              |        | pdb1_A_GLU_20 <--> pdb2_A_PHE_81  |
|                                  |              |        | pdb1_A_ASN_19 <--> pdb2_A_LEU_22  |
|                                  |              |        | pdb1_A_ASN_19 <--> pdb2_A_GLN_25  |
|                                  |              |        | pdb1_A_ASN_19 <--> pdb2_A_VAL_26  |
|                                  |              |        | pdb1_A_ASN_19 <--> pdb2_A_PHE_27  |
|                                  |              |        | pdb1_A_ASN_19 <--> pdb2_A_ASN_28  |
|                                  |              |        | pdb1_A_THR_28 <--> pdb2_A_VAL_26  |
|                                  |              |        | pdb1_A_GLU_20 <--> pdb2_A_MET_37  |
|                                  |              |        | pdb1_A_VAL_41 <--> pdb2_A_ASN_23  |
|                                  |              |        | pdb1_A_VAL_41 <--> pdb2_A_LEU_22  |
|                                  |              |        | pdb1_A_VAL_22 <--> pdb2_A_LEU_22  |
|                                  |              |        | pdb1_A_VAL_22 <--> pdb2_A_LEU_21  |
|                                  |              |        | pdb1_A_SER_23 <--> pdb2_A_PHE_81  |
|                                  |              |        | pdb1_A_VAL_22 <--> pdb2_A_TRP_44  |
|                                  |              |        | pdb1_A_GLU_26 <--> pdb2_A_LEU_22  |
|                                  |              |        | pdb1_A_GLU_26 <--> pdb2_A_ASN_23  |
|                                  |              |        | pdb1_A_ALA_25 <--> pdb2_A_PHE_81  |
|                                  |              |        | pdb1_A_VAL_22 <--> pdb2_A_PHE_81  |
|                                  |              |        | pdb1_A_PRO_24 <--> pdb2_A_LEU_22  |
|                                  |              |        | pdb1_A_ILE_107 <--> pdb2_A_LYS_84 |
|                                  |              |        | pdb1_A_GLN_106 <--> pdb2_A_LYS_84 |
|                                  |              |        | pdb1_A_ARG_110 <--> pdb2_A_LYS_84 |
|                                  |              |        | pdb1_A_SER_23 <--> pdb2_A_PHE_18  |
|                                  |              |        | pdb1_A_ASP_21 <--> pdb2_A_PHE_27  |
|                                  |              |        | pdb1_A_ASP_21 <--> pdb2_A_ASN_28  |
|                                  |              |        | pdb1_A_VAL_22 <--> pdb2_A_PHE_18  |
|                                  |              |        | pdb1_A_ASP_21 <--> pdb2_A_TRP_44  |
|                                  |              |        | pdb1_A_SER_23 <--> pdb2_A_ALA_78  |
|                                  |              |        | pdb1_A_ASP_21 <--> pdb2_A_VAL_41  |
|                                  |              |        | pdb1_A_ASP_21 <--> pdb2_A_VAL_40  |
| pdb1_A_PRO_24 <--> pdb2_A_PHE_18 |              |        |                                   |
| pdb1_A_SER_23 <--> pdb2_A_LEU_77 |              |        |                                   |
| pdb1_A_GLU_20 <--> pdb2_A_ASN_28 |              |        |                                   |
| KLF1                             | L21P of AHSP | -23.27 | pdb2_A_ASP_43 <--> pdb1_A_ASP_29  |
|                                  |              |        | pdb2_A_VAL_26 <--> pdb1_A_TYR_51  |
|                                  |              |        | pdb2_A_VAL_26 <--> pdb1_A_ASN_50  |
|                                  |              |        | pdb2_A_GLN_24 <--> pdb1_A_TYR_51  |
|                                  |              |        | pdb2_A_GLN_24 <--> pdb1_A_TYR_52  |
|                                  |              |        | pdb2_A_ASP_29 <--> pdb1_A_PHE_47  |
|                                  |              |        | pdb2_A_ASP_29 <--> pdb1_A_ASN_46  |
|                                  |              |        | pdb2_A_ASP_29 <--> pdb1_A_ASP_43  |
|                                  |              |        | pdb2_A_GLN_25 <--> pdb1_A_PHE_47  |
|                                  |              |        | pdb2_A_GLN_25 <--> pdb1_A_TRP_44  |
| pdb2_A_PHE_47 <--> pdb1_A_GLN_25 |              |        |                                   |
| pdb2_A_PHE_47 <--> pdb1_A_GLN_24 |              |        |                                   |
| pdb2_A_TYR_48 <--> pdb1_A_GLN_24 |              |        |                                   |

## Mutation near the binding interfaces at AHSP is pathogenic

|      |              |        |                                                                                                                                                                                                                                                                                                                                                                                                                                                                                                                                                                                                                                                                                                                                                                                                                                                                                                                                                                                                                                                                                                                                                                                                                                                                                                                                                                                                                                                                                                                                      |
|------|--------------|--------|--------------------------------------------------------------------------------------------------------------------------------------------------------------------------------------------------------------------------------------------------------------------------------------------------------------------------------------------------------------------------------------------------------------------------------------------------------------------------------------------------------------------------------------------------------------------------------------------------------------------------------------------------------------------------------------------------------------------------------------------------------------------------------------------------------------------------------------------------------------------------------------------------------------------------------------------------------------------------------------------------------------------------------------------------------------------------------------------------------------------------------------------------------------------------------------------------------------------------------------------------------------------------------------------------------------------------------------------------------------------------------------------------------------------------------------------------------------------------------------------------------------------------------------|
|      |              |        | <p>           pdb2_A_PHE_47 &lt;--&gt; pdb1_A_VAL_26<br/>           pdb2_A_TYR_48 &lt;--&gt; pdb1_A_LEU_21<br/>           pdb2_A_VAL_20 &lt;--&gt; pdb1_A_GLU_17<br/>           pdb2_A_ASN_50 &lt;--&gt; pdb1_A_ASP_29<br/>           pdb2_A_GLN_24 &lt;--&gt; pdb1_A_PHE_47<br/>           pdb2_A_GLN_24 &lt;--&gt; pdb1_A_TYR_48<br/>           pdb2_A_VAL_26 &lt;--&gt; pdb1_A_PHE_47<br/>           pdb2_A_PHE_47 &lt;--&gt; pdb1_A_ASP_29<br/>           pdb2_A_TRP_44 &lt;--&gt; pdb1_A_TRP_44<br/>           pdb2_A_TYR_51 &lt;--&gt; pdb1_A_GLN_24<br/>           pdb2_A_ASN_46 &lt;--&gt; pdb1_A_ASP_29<br/>           pdb2_A_TYR_51 &lt;--&gt; pdb1_A_VAL_26<br/>           pdb2_A_ASN_50 &lt;--&gt; pdb1_A_VAL_26<br/>           pdb2_A_ASP_29 &lt;--&gt; pdb1_A_ASN_50<br/>           pdb2_A_LEU_21 &lt;--&gt; pdb1_A_LEU_21<br/>           pdb2_A_PHE_47 &lt;--&gt; pdb1_A_PRO_30<br/>           pdb2_A_GLU_17 &lt;--&gt; pdb1_A_GLN_24<br/>           pdb2_A_GLU_17 &lt;--&gt; pdb1_A_VAL_20<br/>           pdb2_A_TYR_52 &lt;--&gt; pdb1_A_GLN_24<br/>           pdb2_A_LEU_21 &lt;--&gt; pdb1_A_TRP_44<br/>           pdb2_A_GLN_24 &lt;--&gt; pdb1_A_GLU_17         </p>                                                                                                                                                                                                                                                                                                                                            |
| KLF1 | V56G of AHSP | ‡      |                                                                                                                                                                                                                                                                                                                                                                                                                                                                                                                                                                                                                                                                                                                                                                                                                                                                                                                                                                                                                                                                                                                                                                                                                                                                                                                                                                                                                                                                                                                                      |
| AHSP | HBQ1         | -26.08 | <p>           pdb1_A_PRO_80 &lt;--&gt; pdb2_A_ALA_36<br/>           pdb1_A_PRO_80 &lt;--&gt; pdb2_A_THR_33<br/>           pdb1_A_PRO_80 &lt;--&gt; pdb2_A_ARG_32<br/>           pdb1_A_THR_76 &lt;--&gt; pdb2_A_ARG_112<br/>           pdb1_A_PHE_81 &lt;--&gt; pdb2_A_ALA_36<br/>           pdb1_A_ASN_79 &lt;--&gt; pdb2_A_VAL_108<br/>           pdb1_A_PRO_80 &lt;--&gt; pdb2_A_CYS_105<br/>           pdb1_A_PRO_80 &lt;--&gt; pdb2_A_LEU_101<br/>           pdb1_A_THR_76 &lt;--&gt; pdb2_A_ARG_32<br/>           pdb1_A_ASP_87 &lt;--&gt; pdb2_A_GLN_100<br/>           pdb1_A_SER_19 &lt;--&gt; pdb2_A_LYS_41<br/>           pdb1_A_LYS_84 &lt;--&gt; pdb2_A_ALA_97<br/>           pdb1_A_SER_12 &lt;--&gt; pdb2_A_PRO_51<br/>           pdb1_A_LYS_16 &lt;--&gt; pdb2_A_SER_50<br/>           pdb1_A_LYS_16 &lt;--&gt; pdb2_A_PRO_51<br/>           pdb1_A_LEU_77 &lt;--&gt; pdb2_A_ALA_36<br/>           pdb1_A_LEU_77 &lt;--&gt; pdb2_A_LEU_35<br/>           pdb1_A_ALA_83 &lt;--&gt; pdb2_A_HIS_104<br/>           pdb1_A_LYS_84 &lt;--&gt; pdb2_A_PHE_37<br/>           pdb1_A_SER_19 &lt;--&gt; pdb2_A_LEU_35<br/>           pdb1_A_LEU_15 &lt;--&gt; pdb2_A_PRO_51<br/>           pdb1_A_LEU_22 &lt;--&gt; pdb2_A_PRO_38<br/>           pdb1_A_ASN_23 &lt;--&gt; pdb2_A_PRO_38<br/>           pdb1_A_LYS_84 &lt;--&gt; pdb2_A_LEU_101<br/>           pdb1_A_LEU_22 &lt;--&gt; pdb2_A_LEU_35<br/>           pdb1_A_LEU_22 &lt;--&gt; pdb2_A_ALA_36<br/>           pdb1_A_LEU_15 &lt;--&gt; pdb2_A_LEU_35         </p> |

## Mutation near the binding interfaces at AHSP is pathogenic

|      |              |        |                                                                                                                                                                                                                                                                                                                                                                                                                                                                                                                                                                                                                                                                                                                                                                                                                                                                                                                                                                                                                                                                                                                                                                                                                                                                                                                                                                                                                                   |
|------|--------------|--------|-----------------------------------------------------------------------------------------------------------------------------------------------------------------------------------------------------------------------------------------------------------------------------------------------------------------------------------------------------------------------------------------------------------------------------------------------------------------------------------------------------------------------------------------------------------------------------------------------------------------------------------------------------------------------------------------------------------------------------------------------------------------------------------------------------------------------------------------------------------------------------------------------------------------------------------------------------------------------------------------------------------------------------------------------------------------------------------------------------------------------------------------------------------------------------------------------------------------------------------------------------------------------------------------------------------------------------------------------------------------------------------------------------------------------------------|
| HBQ1 | Y85C of AHSP | -28.89 | <p>           pdb2_A_GLN_54 &lt;--&gt; pdb1_A_ARG_112<br/>           pdb2_A_GLN_54 &lt;--&gt; pdb1_A_ALA_111<br/>           pdb2_A_GLU_59 &lt;--&gt; pdb1_A_LEU_101<br/>           pdb2_A_GLN_54 &lt;--&gt; pdb1_A_ARG_32<br/>           pdb2_A_ARG_53 &lt;--&gt; pdb1_A_VAL_108<br/>           pdb2_A_ASN_46 &lt;--&gt; pdb1_A_PRO_120<br/>           pdb2_A_ASN_50 &lt;--&gt; pdb1_A_PHE_118<br/>           pdb2_A_THR_57 &lt;--&gt; pdb1_A_HIS_104<br/>           pdb2_A_ARG_53 &lt;--&gt; pdb1_A_PHE_118<br/>           pdb2_A_ARG_53 &lt;--&gt; pdb1_A_ALA_111<br/>           pdb2_A_GLY_58 &lt;--&gt; pdb1_A_HIS_104<br/>           pdb2_A_THR_57 &lt;--&gt; pdb1_A_ALA_36<br/>           pdb2_A_PRO_60 &lt;--&gt; pdb1_A_GLN_100<br/>           pdb2_A_GLN_54 &lt;--&gt; pdb1_A_VAL_108<br/>           pdb2_A_ASN_50 &lt;--&gt; pdb1_A_ALA_111<br/>           pdb2_A_GLN_55 &lt;--&gt; pdb1_A_VAL_108<br/>           pdb2_A_GLU_59 &lt;--&gt; pdb1_A_PHE_37<br/>           pdb2_A_ARG_53 &lt;--&gt; pdb1_A_GLN_123<br/>           pdb2_A_ARG_53 &lt;--&gt; pdb1_A_PRO_120<br/>           pdb2_A_ARG_63 &lt;--&gt; pdb1_A_HIS_104<br/>           pdb2_A_VAL_56 &lt;--&gt; pdb1_A_VAL_108<br/>           pdb2_A_VAL_56 &lt;--&gt; pdb1_A_HIS_104<br/>           pdb2_A_ARG_63 &lt;--&gt; pdb1_A_GLN_123<br/>           pdb2_A_ASN_50 &lt;--&gt; pdb1_A_PRO_115         </p>                                                  |
| HBQ1 | L21P of AHSP | -25.45 | <p>           pdb1_A_HIS_104 &lt;--&gt; pdb2_A_LYS_16<br/>           pdb1_A_PRO_120 &lt;--&gt; pdb2_A_ALA_6<br/>           pdb1_A_PRO_120 &lt;--&gt; pdb2_A_GLN_55<br/>           pdb1_A_PRO_120 &lt;--&gt; pdb2_A_VAL_56<br/>           pdb1_A_PRO_120 &lt;--&gt; pdb2_A_LEU_10<br/>           pdb1_A_ALA_111 &lt;--&gt; pdb2_A_GLU_17<br/>           pdb1_A_VAL_108 &lt;--&gt; pdb2_A_GLU_17<br/>           pdb1_A_VAL_108 &lt;--&gt; pdb2_A_LYS_16<br/>           pdb1_A_GLN_123 &lt;--&gt; pdb2_A_LEU_10<br/>           pdb1_A_PHE_118 &lt;--&gt; pdb2_A_ALA_13<br/>           pdb1_A_PHE_118 &lt;--&gt; pdb2_A_GLN_55<br/>           pdb1_A_GLN_123 &lt;--&gt; pdb2_A_ALA_13<br/>           pdb1_A_CYS_105 &lt;--&gt; pdb2_A_VAL_20<br/>           pdb1_A_SER_119 &lt;--&gt; pdb2_A_GLN_55<br/>           pdb1_A_ALA_36 &lt;--&gt; pdb2_A_VAL_20<br/>           pdb1_A_ALA_36 &lt;--&gt; pdb2_A_ASN_23<br/>           pdb1_A_ALA_36 &lt;--&gt; pdb2_A_GLN_24<br/>           pdb1_A_PRO_115 &lt;--&gt; pdb2_A_TYR_51<br/>           pdb1_A_LEU_35 &lt;--&gt; pdb2_A_GLN_24<br/>           pdb1_A_PRO_115 &lt;--&gt; pdb2_A_GLN_55<br/>           pdb1_A_PHE_37 &lt;--&gt; pdb2_A_VAL_20<br/>           pdb1_A_PHE_37 &lt;--&gt; pdb2_A_ASN_23<br/>           pdb1_A_ARG_32 &lt;--&gt; pdb2_A_GLN_24<br/>           pdb1_A_VAL_108 &lt;--&gt; pdb2_A_VAL_20<br/>           pdb1_A_ALA_124 &lt;--&gt; pdb2_A_ASP_9         </p> |

## Mutation near the binding interfaces at AHSP is pathogenic

|      |              |        |                                                                                                                                                                                                                                                                                                                                                                                                                                                                                                                                                                                                                                                                                                                                                                                                                                                                                                                                                                                     |
|------|--------------|--------|-------------------------------------------------------------------------------------------------------------------------------------------------------------------------------------------------------------------------------------------------------------------------------------------------------------------------------------------------------------------------------------------------------------------------------------------------------------------------------------------------------------------------------------------------------------------------------------------------------------------------------------------------------------------------------------------------------------------------------------------------------------------------------------------------------------------------------------------------------------------------------------------------------------------------------------------------------------------------------------|
| HBQ1 | V56G of AHSP | -34.64 | pdb1_A_PRO_120 <--> pdb2_A ASP_9<br>pdb1_A_PRO_120 <--> pdb2_A ASN_7<br>pdb1_A_PRO_120 <--> pdb2_A ALA_6<br>pdb1_A_PRO_120 <--> pdb2_A GLN_55<br>pdb1_A_GLN_123 <--> pdb2_A GLU_17<br>pdb1_A_PRO_120 <--> pdb2_A LEU_10<br>pdb1_A_ALA_111 <--> pdb2_A GLU_17<br>pdb1_A_SER_119 <--> pdb2_A LEU_10<br>pdb1_A_VAL_108 <--> pdb2_A GLU_17<br>pdb1_A_VAL_108 <--> pdb2_A LYS_16<br>pdb1_A_PHE_118 <--> pdb2_A LEU_10<br>pdb1_A_GLN_123 <--> pdb2_A ALA_13<br>pdb1_A_CYS_105 <--> pdb2_A VAL_20<br>pdb1_A_ALA_36 <--> pdb2_A ASN_23<br>pdb1_A_ALA_36 <--> pdb2_A GLN_24<br>pdb1_A_LEU_35 <--> pdb2_A VAL_26<br>pdb1_A_LEU_35 <--> pdb2_A GLN_24<br>pdb1_A_PRO_115 <--> pdb2_A GLN_55<br>pdb1_A_HIS_104 <--> pdb2_A VAL_20<br>pdb1_A_PHE_37 <--> pdb2_A ASN_23<br>pdb1_A_ARG_32 <--> pdb2_A GLN_24<br>pdb1_A_ARG_32 <--> pdb2_A VAL_20<br>pdb1_A_LEU_107 <--> pdb2_A GLU_17<br>pdb1_A_VAL_108 <--> pdb2_A VAL_20<br>pdb1_A_ALA_124 <--> pdb2_A ASP_9<br>pdb1_A ASP_127 <--> pdb2_A LYS_16 |
|------|--------------|--------|-------------------------------------------------------------------------------------------------------------------------------------------------------------------------------------------------------------------------------------------------------------------------------------------------------------------------------------------------------------------------------------------------------------------------------------------------------------------------------------------------------------------------------------------------------------------------------------------------------------------------------------------------------------------------------------------------------------------------------------------------------------------------------------------------------------------------------------------------------------------------------------------------------------------------------------------------------------------------------------|

---

‡No interaction was found.
